# Supplementary material for: A monoclonal antibody against lymphocyte function-associated antigen-1 decreases HIV-1 replication by inducing the secretion of an antiviral soluble factor
Source: PubMed Central journal article supplement (PMC3648404; doi:10.1186/1743-422x-10-120), 2013-04-18
Supplement: 1743-422X-10-120-S1.pdf [file 1743-422X-10-120-S1.pdf]

Supplemental Table 1

| <b>ANALYTE</b>         | <b>MEAN PBS<br/>(RLU)</b> | <b>MEAN CYTOLIN<br/>(RLU)</b> | <b>SIGNIFICANCE*</b> |
|------------------------|---------------------------|-------------------------------|----------------------|
| <b>Acrp30</b>          | -2421                     | -1537                         |                      |
| <b>Activin A</b>       | 43                        | 44                            |                      |
| <b>AgRP</b>            | 51                        | 46                            |                      |
| <b>ALCAM</b>           | 1012                      | 562                           |                      |
| <b>Amphiregulin</b>    | 80                        | 50                            |                      |
| <b>Angiogenin</b>      | -3086                     | -1294                         |                      |
| <b>Angiopoietin-2</b>  | 27                        | 41                            |                      |
| <b>Axl</b>             | 29                        | 28                            |                      |
| <b>b-NGF</b>           | -22                       | -40                           |                      |
| <b>B7-1(CD80)</b>      | 173                       | 146                           |                      |
| <b>BDNF</b>            | 115                       | 79                            |                      |
| <b>bFGF</b>            | -16                       | -34                           |                      |
| <b>BLC</b>             | 20                        | 35                            |                      |
| <b>BMP-4</b>           | -1                        | 10                            |                      |
| <b>BMP-5</b>           | 78                        | 86                            |                      |
| <b>BMP-6</b>           | 15                        | 9                             |                      |
| <b>BMP-7</b>           | -6                        | -10                           |                      |
| <b>BTC</b>             | 7                         | 35                            |                      |
| <b>Cardiotrophin-1</b> | 9                         | -14                           |                      |
| <b>CCL-28</b>          | 60                        | 83                            |                      |
| <b>CD14</b>            | 3785                      | 5536                          |                      |
| <b>CK beta 8-1</b>     | 7                         | 7                             |                      |
| <b>CNTF</b>            | 25                        | 18                            |                      |
| <b>CTACK</b>           | 241                       | 259                           |                      |
| <b>CXCL- 16</b>        | 450                       | 902                           |                      |
| <b>DR6 (TNFRSF21)</b>  | 96                        | 187                           |                      |
| <b>Dtk</b>             | -96                       | -125                          |                      |
| <b>E-Selectin</b>      | 236                       | 112                           |                      |
| <b>EGF</b>             | 1230                      | 2241                          | p=0.03               |
| <b>EGF-R</b>           | -535                      | -655                          |                      |
| <b>ENA-78</b>          | 33000                     | 34068                         |                      |
| <b>Endoglin</b>        | 179                       | 35                            |                      |
| <b>Eotaxin</b>         | 10                        | 20                            |                      |
| <b>Eotaxin-2</b>       | 8400                      | 8510                          |                      |
| <b>Eotaxin-3</b>       | -18                       | 12                            |                      |
| <b>ErbB3</b>           | 210                       | 165                           |                      |
| <b>Fas Ligand</b>      | 53                        | 106                           |                      |
| <b>Fas/TNFRSF6</b>     | -159                      | -78                           |                      |
| <b>FGF-4</b>           | 50                        | 27                            |                      |
| <b>FGF-6</b>           | 97                        | 63                            |                      |
| <b>FGF-7</b>           | 30                        | 37                            |                      |
| <b>FGF-9</b>           | 28                        | 60                            |                      |
| <b>Flt-3 Ligand</b>    | 67                        | 72                            |                      |
| <b>Fractalkine</b>     | 20                        | 27                            |                      |
| <b>GCP-2</b>           | 28                        | 30                            |                      |
| <b>GCSF</b>            | 208                       | 253                           |                      |

|                      |       |       |
|----------------------|-------|-------|
| <b>GDNF</b>          | -8    | -13   |
| <b>GITR</b>          | 30    | -3    |
| <b>GITR-Ligand</b>   | 4     | 0     |
| <b>GM-CSF</b>        | 6     | 13    |
| <b>GRO</b>           | 55167 | 49098 |
| <b>GRO-alpha</b>     | 495   | 320   |
| <b>HCC-4</b>         | 32    | 36    |
| <b>HGF</b>           | 11    | 6     |
| <b>I-309</b>         | -4    | -2    |
| <b>I-TAC</b>         | 9     | -1    |
| <b>ICAM-1</b>        | -2342 | -3768 |
| <b>ICAM-2</b>        | -1303 | -1235 |
| <b>ICAM-3</b>        | 1     | 1     |
| <b>IFN-gamma</b>     | 68    | 2     |
| <b>IGF-I</b>         | 77    | 84    |
| <b>IGF-I SR</b>      | 45    | -8    |
| <b>IGF-II</b>        | 4567  | 2041  |
| <b>IGFBP-1</b>       | 455   | 64    |
| <b>IGFBP-2</b>       | 400   | 790   |
| <b>IGFBP-3</b>       | -329  | -174  |
| <b>IGFBP-4</b>       | 0     | -2    |
| <b>IGFBP-6</b>       | 273   | -10   |
| <b>IL-1 R II</b>     | 51    | 29    |
| <b>IL-1 R4/ST2</b>   | 57    | 28    |
| <b>IL-1 RI</b>       | 18    | 2     |
| <b>IL-10</b>         | 61    | 90    |
| <b>IL-10 Rbeta</b>   | 58    | 74    |
| <b>IL-11</b>         | 48    | 19    |
| <b>IL-12 p40</b>     | 132   | 121   |
| <b>IL-12 p70</b>     | -10   | -25   |
| <b>IL-13</b>         | 63    | 75    |
| <b>IL-13 Ralpha2</b> | 46    | 42    |
| <b>IL-15</b>         | 68    | 94    |
| <b>IL-16</b>         | 22    | 34    |
| <b>IL-17</b>         | 67    | 24    |
| <b>IL-18 BPalph</b>  | 96    | 124   |
| <b>IL-18 Rbeta</b>   | -70   | -15   |
| <b>IL-1alpha</b>     | 24    | -3    |
| <b>IL-1beta</b>      | 148   | 143   |
| <b>IL-1ra</b>        | 64    | 20    |
| <b>IL-2</b>          | 34    | 42    |
| <b>IL-2 Ralpha</b>   | 154   | 157   |
| <b>IL-2 Rbeta</b>    | 37    | 8     |
| <b>IL-2 Rgamma</b>   | 14    | 14    |
| <b>IL-2 Rgamma</b>   | 78    | 146   |
| <b>IL-21R</b>        | 15    | 12    |
| <b>IL-3</b>          | 26    | 12    |
| <b>IL-4</b>          | 20    | 13    |
| <b>IL-5</b>          | 100   | 90    |

|                 |       |       |
|-----------------|-------|-------|
| IL-5 Ralpha     | 10    | 8     |
| IL-6            | 536   | 272   |
| IL-6 R          | 286   | 554   |
| IL-7            | 49    | 6     |
| IL-8            | 37445 | 46598 |
| IL-9            | 94    | 27    |
| IP-10           | 66    | 5     |
| L-Selectin      | -4475 | -3857 |
| LAP             | 4071  | 4795  |
| Leptin          | 93    | 111   |
| Leptin R        | 122   | 62    |
| LIF             | 94    | 91    |
| LIGHT           | 20    | 31    |
| Lymphotactin    | 19    | 18    |
| M-CSF           | 28    | 25    |
| M-CSF R         | 84    | 51    |
| MCP-1           | 17531 | 19432 |
| MCP-2           | 24    | 24    |
| MCP-3           | 17575 | 20702 |
| MCP-4           | 7     | 20    |
| MDC             | 242   | 151   |
| MIF             | 1943  | 1973  |
| MIG             | 30    | 21    |
| MIP-1-delta     | 7     | 8     |
| MIP-1alpha      | 7692  | 8473  |
| MIP-1beta       | 32216 | 33829 |
| MIP-3-alpha     | 9     | 15    |
| MIP-3beta       | 9     | 14    |
| MMP-1           | 130   | 114   |
| MMP-13          | -10   | -28   |
| MMP-9           | 526   | 323   |
| MPIF-1          | 12    | 28    |
| MSP-alpha       | -5831 | -4476 |
| NAP-2           | 6570  | 6863  |
| NGF R           | 130   | 167   |
| NT-3            | 51    | 13    |
| NT-4            | 38    | 35    |
| Oncostatin M    | 177   | 173   |
| Osteoprotegerin | 48    | 148   |
| PARC            | 39    | 67    |
| PDGF AA         | 2035  | 899   |
| PDGF Ralpha     | 2     | -1    |
| PDGF Rbeta      | 70    | 19    |
| PDGF-AB         | 339   | 210   |
| PDGF-BB         | 8877  | 7715  |
| PECAM-1         | 66    | 33    |
| PIGF            | 9     | 1     |
| Prolactin       | 4     | 8     |
| RANTES          | 33710 | 40335 |

|                       |       |       |
|-----------------------|-------|-------|
| <b>SCF</b>            | 6     | 30    |
| <b>SCF R</b>          | 99    | 280   |
| <b>SDF-1</b>          | 31    | 40    |
| <b>SDF-1beta</b>      | 30    | 40    |
| <b>sgp130</b>         | 202   | 192   |
| <b>Siglec-5</b>       | 5839  | 6156  |
| <b>sTNF RII</b>       | 1748  | 2951  |
| <b>sTNF-RI</b>        | 64    | 33    |
| <b>TARC</b>           | 57    | 58    |
| <b>TECK</b>           | 16    | 17    |
| <b>TGF beta2</b>      | 72    | 21    |
| <b>TGF-alpha</b>      | -10   | -20   |
| <b>TGF-beta 1</b>     | 118   | 145   |
| <b>TGF-beta 3</b>     | -11   | 1     |
| <b>Thrombopoietin</b> | -12   | 0     |
| <b>Tie-1</b>          | -29   | -4    |
| <b>Tie-2</b>          | 7     | 15    |
| <b>TIMP-1</b>         | 4240  | 2995  |
| <b>TIMP-2</b>         | -2524 | -5141 |
| <b>TIMP-4</b>         | 226   | 171   |
| <b>TNF-alpha</b>      | 57    | 79    |
| <b>TNF-beta</b>       | 73    | 57    |
| <b>TRAIL R3</b>       | 7     | 4     |
| <b>TRAIL R4</b>       | 4     | 3     |
| <b>uPAR</b>           | 10844 | 10554 |
| <b>VE-Cadherin</b>    | 84    | 25    |
| <b>VEGF</b>           | 21    | 31    |
| <b>VEGF R2</b>        | 60    | 29    |
| <b>VEGF R3</b>        | 19    | 9     |
| <b>VEGF-D</b>         | 33    | 40    |

RLU = Relative Light Units

Data shown are the mean signal intensity for each analyte of PBS and Cytolin treated supernatants after subtracting out the signal intensity of the media control.

\*Unless otherwise indicated, the mean signal intensity in Cytolin treated supernatants was not significantly higher than in control treated supernatants.
